# Supplementary material for: Magnetic Nanoparticles Conjugated with Peptides Derived from Monocyte Chemoattractant Protein-1 as a Tool for Targeting Atherosclerosis
Source: PubMed Central journal article supplement (PMC6027309; doi:10.3390/pharmaceutics10020062), 2018-05-24
Supplement: pharmaceutics-10-00062-s001.pdf [file pharmaceutics-10-00062-s001.pdf]

# Supplementary Materials: Magnetic Nanoparticles Conjugated with Peptides Derived from Monocyte Chemoattractant Protein-1 as a Tool for Targeting Atherosclerosis

Chung-Wei Kao, Po-Ting Wu, Mei-Yi Liao, I-Ju Chung, Kai-Chien Yang, Wen-Yih Isaac Tseng, Jiashing Yu

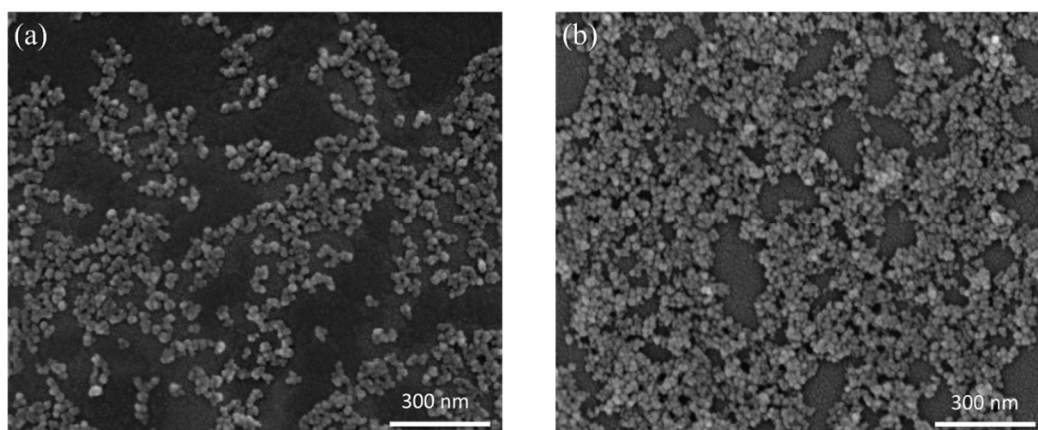

**Figure S1.** Characterization of (a) magnetic nanoparticles (MNPs) and (b) monocytes chemoattractant protein-1 (MCP-1)-motif MNPs using scanning electron microscope (SEM).

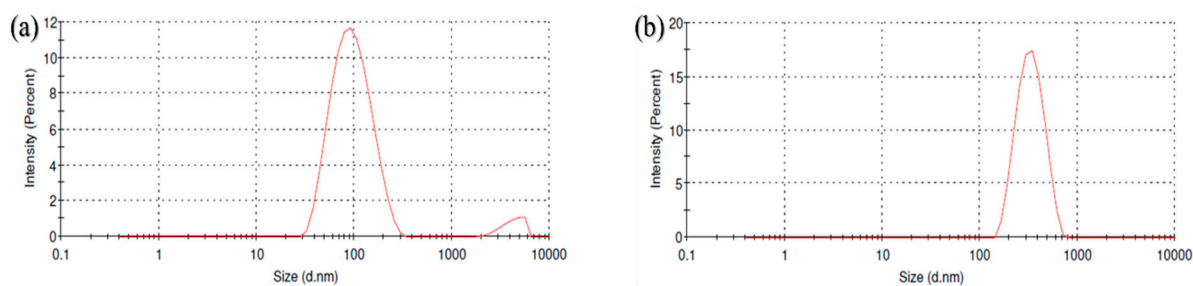

**Figure S2.** Hydrodynamic distribution of (a) MNPs and (b) MCP-1-motif MNPs by dynamic light scattering (DLS).

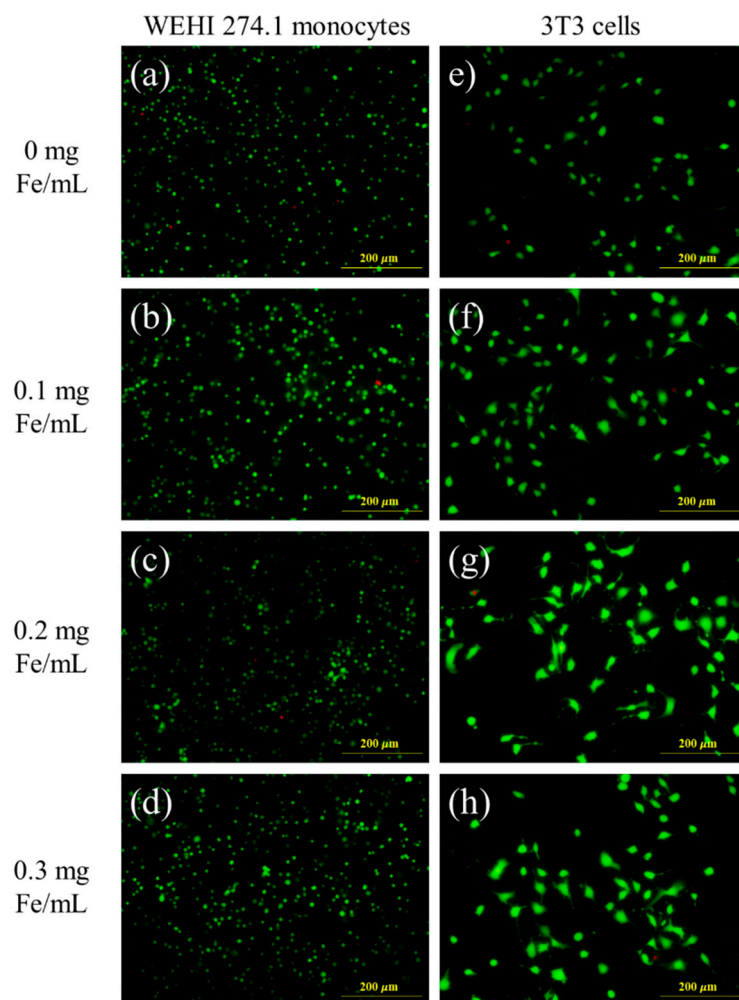

**Figure S3.** Live/Dead assay of (a–d) WEHI 274.1 monocytes and (e–h) 3T3 cells s with 0 to 0.3 mg Fe/mL MCP-1-motif MNPs at day 1.

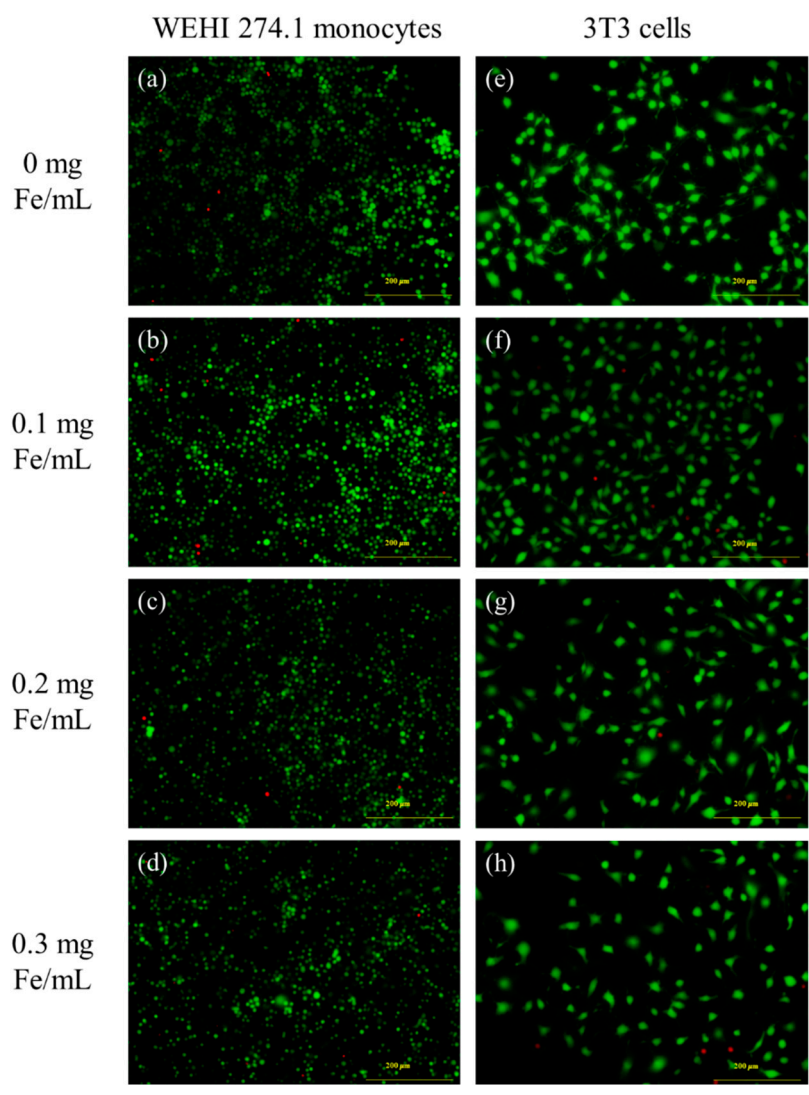

**Figure S4.** Live/Dead assay of (a–d) WEHI 274.1 monocytes and (e–h) 3T3 cells with 0 to 0.3 mg Fe/mL with MCP-1-motif MNPs at day 4.

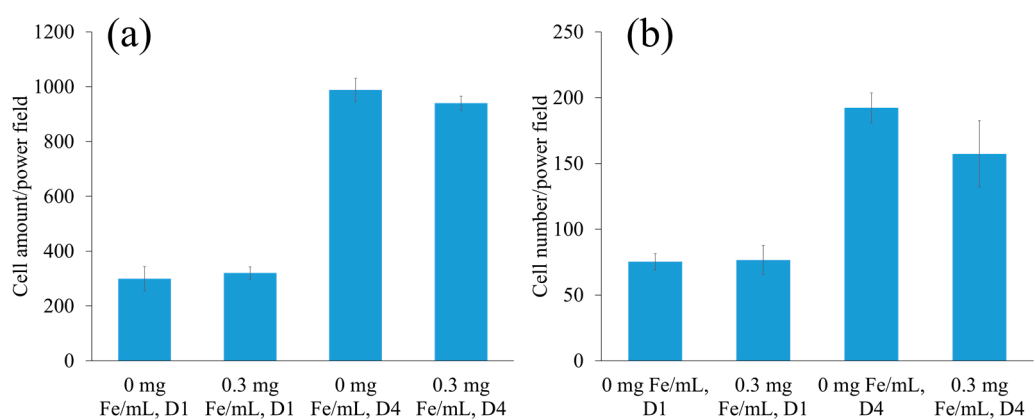

**Figure S5.** Cell counting of (a) WEHI 274.1 monocytes and (b) 3T3 cells. ( $n = 3$ ).

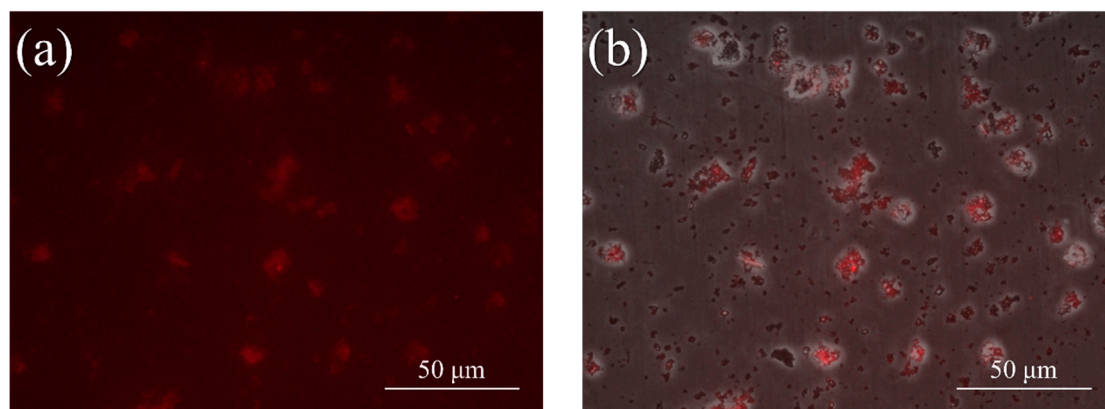

**Figure S6.** (a) Fluorescence image and (b) optical image of the Cy5-MCP-1-motif MNPs.

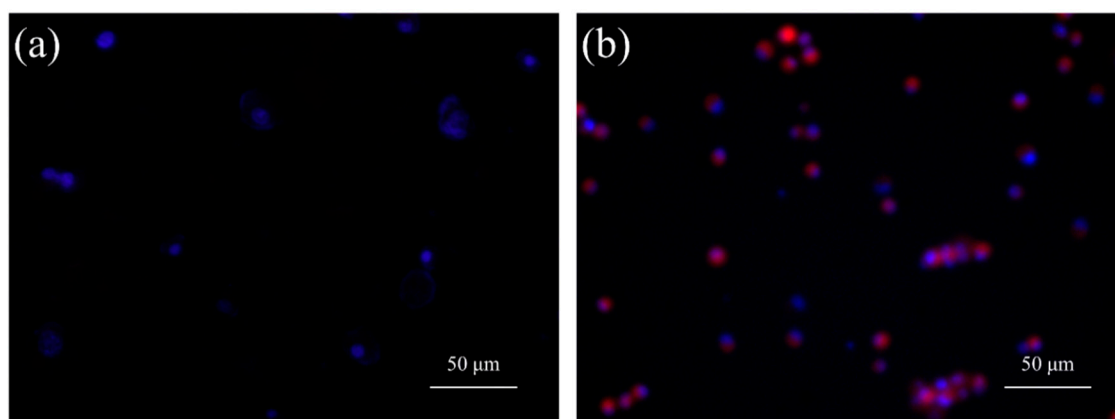

**Figure S7.** Fluorescence image of (a) 3T3 cells and (b) WEHI 274.1 monocytes cultured with Cy5-MCP-1-motif MNPs.

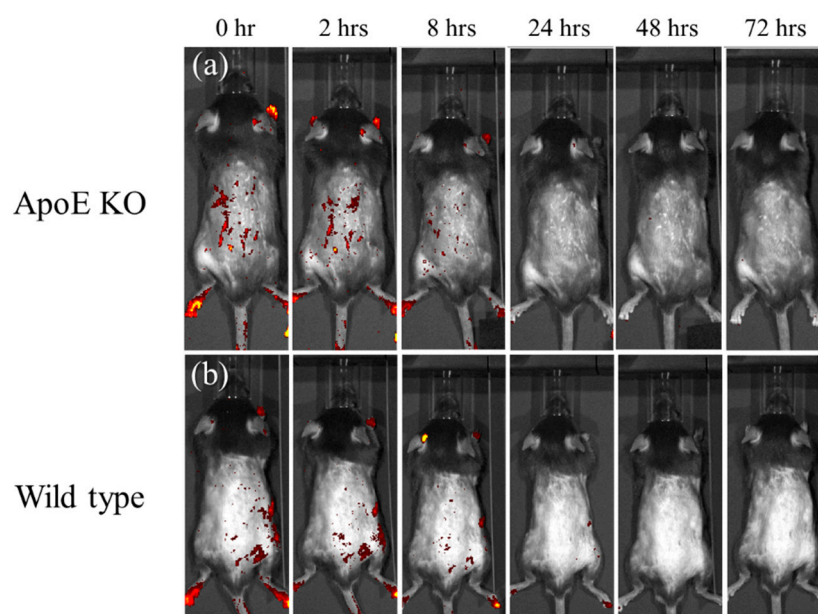

**Figure S8.** IVIS body fluorescence of (a) ApoE KO mice and (b) wild type mice injected with PBS from 0 to 72 hr-injection.

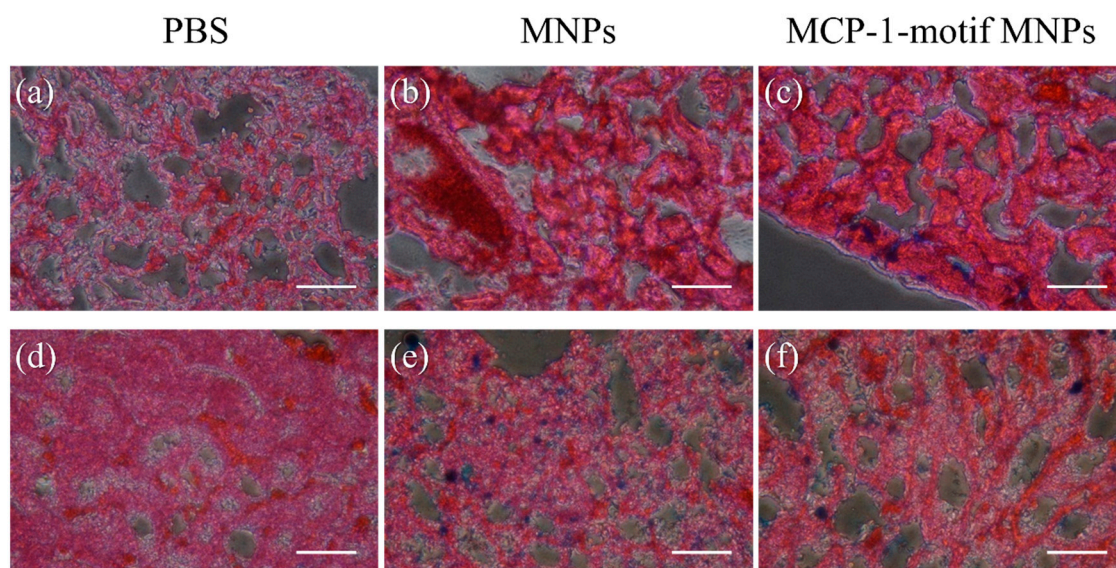

**Figure S9.** Prussian Blue and hematoxylin staining of kidney of (a–c) ApoE KO mice and (d–f) wild type mice (scale bar = 50  $\mu\text{m}$ ).

**Table S1.** Bond composition ratio of the iron oxide MNPs.

|     | Bond                           | Binding Energy (eV) | MNPs           | MCP-1-motif MNPs |
|-----|--------------------------------|---------------------|----------------|------------------|
|     |                                |                     | Percentage (%) |                  |
| C1s | C-C                            | 284.5               | 99.9           | 77.2             |
|     | C-O                            | 286.0               | ~0.1           | 19.5             |
|     | C=O                            | 288.0               | ~0.1           | 3.3              |
| N1s | N(H)-C                         | 398.8               | 99.7           | 20.0             |
|     | N(C)-C                         | 400.0               | 0.2            | 80.0             |
|     | O=C                            | 532.0               | 17.6           | 57.7             |
| O1s | O-C                            | 533.3               | ~0.1           | 2.0              |
|     | Fe <sub>3</sub> O <sub>4</sub> | 529.7               | 31.5           | 22.0             |
|     | H <sub>2</sub> O               | 535.3               | 50.9           | 18.3             |

Magnetic nanoparticles (MNPs), monocytes chemoattractant protein-1 (MCP-1), carbon 1s orbital (C1s), nitrogen 1s orbital (N1s), oxygen 1s orbital (O1s).
